# Supplementary material for: CPMIP: Measurements of Real Computational Performance of Earth System Models
Source: Copernicus journal article supplement (doi:10.5194/gmd-2016-197), 2016-08-24
Supplement: Supplementary file [file gmd-2016-197-AC1-supplement.pdf]

Response to gmd-2016-197-SC1:

1. In agreement with the CMIP6 panel members, the Executive editors of GMD would like to establish a common naming convention for the titles of the CMIP6 experiment description papers. The title of CMIP6 papers should include both the acronym of the MIP, and CMIP6, so that it is clear this is a CMIP6-Endorsed MIP.

5 Good formats for the title include: “XYZMIP contribution to CMIP6: Name of project” or “Name of Project (XYZMIP) contribution to CMIP6”

If you want to include a more descriptive title, the format could be along the lines of,

“XYZMIP contribution to CMIP6: Name of project - descriptive title” or “Name of Project (XYZMIP) contribution to CMIP6: descriptive title.”

10 When you revise your manuscript, please add the reference to CMIP6 in the title of your manuscript accordingly.

Additionally, we strongly recommend to add a version number to the MIP description. The reason for the version numbers is so that the MIP protocol can be updated later, normally in a second short paper outlining the changes. See, for example: [http://www.geosci-model-dev.net/special\\_issue11.html](http://www.geosci-model-dev.net/special_issue11.html)

15 [See page 1, line 1. We have modified the title as requested. We envision the CPMIP database to accumulate results across model generations, so we we could like to keep the same name even if the version changes.](#)
